# Supplementary material for: Exploring the Association between Anxiety, Depression, and Gut Microbiota during Pregnancy: Findings from a Pregnancy Cohort Study in Shijiazhuang, Hebei Province, China
Source: MDPI journal article supplement (doi:10.3390/nu16101460), 2024-05-12
Supplement: s1 [file s1]

## Supplementary materials

Table S1: The List of Species Significantly Associated with Anxiety and Depression in Unadjusted Model

| Feature                    | Variable         | Estimate | Standard Error | P      | Q     |
|----------------------------|------------------|----------|----------------|--------|-------|
| Butyricimonas_sp._An62     | Depression Score | 0.000002 | 0.0000004      | <0.001 | 0.069 |
| Oscillibacter_sp._KLE_1745 | Depression Score | 0.000003 | 0.0000007      | <0.001 | 0.131 |
| Oscillibacter_sp._KLE_1728 | Anxiety Score    | 0.000013 | 0.0000008      | <0.001 | 0.167 |
| Oscillibacter_sp._KLE_1745 | Anxiety Score    | 0.000004 | 0.0000008      | <0.001 | 0.167 |
| Oscillibacter_sp._PEA192   | Anxiety Score    | 0.000024 | 0.0000031      | <0.001 | 0.167 |

Table summarizing the species significantly associated with anxiety and depression. The generalized linear mixed-effects regressions conducted using MaAsLin2 were adjusted for time, with subject as a random intercept.

Table S2: The List of Species Significantly Associated with Anxiety and Depression in Adjusted Model

| Feature                             | Variable         | Estimate  | Standard Error | P      | Q     |
|-------------------------------------|------------------|-----------|----------------|--------|-------|
| Oscillibacter_sp._KLE_1745          | Anxiety Score    | 0.0000043 | 0.0000009      | <0.001 | 0.003 |
| Oscillibacter_sp._PEA192            | Anxiety Score    | 0.0000258 | 0.0000056      | <0.001 | 0.010 |
| Oscillibacter_sp._KLE_1728          | Anxiety Score    | 0.0000145 | 0.0000032      | <0.001 | 0.011 |
| Oscillibacter_sp._KLE_1745          | Depression Score | 0.0000032 | 0.0000007      | <0.001 | 0.015 |
| Oscillospiraceae_bacterium_VE202_24 | Anxiety Score    | 0.0000043 | 0.0000010      | <0.001 | 0.018 |
| Oscillibacter_sp._KLE_1745          | Group_Anxiety    | 0.0000977 | 0.0000221      | <0.001 | 0.018 |
| Treponema_socranskii                | Anxiety Score    | 0.0000004 | 0.0000001      | <0.001 | 0.040 |
| Oscillibacter_sp._KLE_1728          | Group_Anxiety    | 0.0003350 | 0.0000808      | <0.001 | 0.046 |
| Neocallimastix_californiae          | Group_Anxiety    | 0.0000139 | 0.0000036      | <0.001 | 0.065 |
| Alistipes_sp._AL_1                  | Group_Anxiety    | 0.0001564 | 0.0000393      | <0.001 | 0.065 |
| Oscillibacter_sp._KLE_1728          | Depression Score | 0.0000107 | 0.0000027      | <0.001 | 0.069 |
| Bacteroides_sp._41_26               | Depression Score | 0.0000009 | 0.0000002      | <0.001 | 0.069 |
| Firmicutes_bacterium_CAG_137        | Group_Anxiety    | 0.0003328 | 0.0000839      | <0.001 | 0.071 |
| Oscillibacter_sp._PEA192            | Depression Score | 0.0000188 | 0.0000047      | <0.001 | 0.075 |
| Bacteroides_nordii                  | Depression Score | 0.0000217 | 0.0000055      | <0.001 | 0.077 |
| Oscillospiraceae_bacterium_VE202_24 | Depression Score | 0.0000032 | 0.0000008      | <0.001 | 0.078 |
| Butyricimonas_sp._An62              | Depression Score | 0.0000016 | 0.0000004      | <0.001 | 0.086 |
| Dysgonomonas_mossii                 | Group_Anxiety    | 0.0000063 | 0.0000013      | <0.001 | 0.086 |
| Firmicutes_bacterium_CAG_137_57_8   | Group_Anxiety    | 0.0000802 | 0.0000207      | <0.001 | 0.087 |
| Ruminococcus_sp._AM41_10BH          | Anxiety Score    | 0.0000009 | 0.0000002      | <0.001 | 0.091 |
| Bacteroides_sp._AR20                | Group_Depression | 0.0000644 | 0.0000167      | <0.001 | 0.101 |
| Bacteroides_sp._HPS0048             | Depression Score | 0.0000090 | 0.0000024      | <0.001 | 0.108 |
| Oscillibacter_sp._KLE_1745          | Group_Depression | 0.0000758 | 0.0000201      | <0.001 | 0.125 |
| Prevotella_sp._P5_108               | Group_Depression | 0.0000142 | 0.0000039      | <0.001 | 0.129 |
| Faecalibacterium_virus_Brigit       | Depression Score | 0.0000006 | 0.0000002      | <0.001 | 0.136 |
| Desulfotomaculum_aeronauticum       | Group_Anxiety    | 0.0000090 | 0.0000025      | <0.001 | 0.141 |
| Bacillus_saganii                    | Group_Anxiety    | 0.0000052 | 0.0000012      | <0.001 | 0.153 |
| Acetivibrio_thermocellus            | Group_Anxiety    | 0.0000151 | 0.0000042      | <0.001 | 0.173 |

|                                     |                  |           |           |        |       |
|-------------------------------------|------------------|-----------|-----------|--------|-------|
| Bacillus_saganii                    | Anxiety Score    | 0.0000002 | 0.0000000 | <0.001 | 0.177 |
| Oscillibacter_sp._PEA192            | Group_Anxiety    | 0.0005269 | 0.0001461 | <0.001 | 0.180 |
| Clostridium_sp._HGF2                | Group_Anxiety    | 0.0000450 | 0.0000127 | <0.001 | 0.200 |
| Ruminococcus_sp._OF03_6AA           | Anxiety Score    | 0.0000010 | 0.0000003 | 0.001  | 0.209 |
| Oscillospiraceae_bacterium_VE202_24 | Group_Anxiety    | 0.0000880 | 0.0000251 | 0.001  | 0.219 |
| Ruminococcus_sp._AM41_10BH          | Group_Anxiety    | 0.0000204 | 0.0000059 | 0.001  | 0.222 |
| Butyricimonas_synergistica          | Depression Score | 0.0000023 | 0.0000007 | 0.001  | 0.246 |

Table S2 summarizing the species significantly associated with anxiety and depression. The generalized linear mixed-effects regressions conducted using MaAsLin2 were adjusted for time, age, parity, pre-pregnancy BMI, history of smoking, alcohol drinking before pregnancy, energy intake, physical activity level, probiotics, and prebiotics intake, with subject as a random intercept. Group\_Anxiety represents grouping based on anxiety status (Anxiety/Non-Anxiety), while Group\_Depression represents grouping based on depression status (Depression/Non-Depression).

Table S3: Functional Pathways and Their Correlation with Anxiety/Depression Scores and Anxiety/Non-anxiety and Depression/Non-depression Groupings in Unadjusted Model

| Pathway                                                      | Variable         | Estimate   | Standard Error | P     | Q     |
|--------------------------------------------------------------|------------------|------------|----------------|-------|-------|
| ko00430: Taurine.and.hypotaurine.metabolism                  | Anxiety Score    | 0.0000035  | 0.0000013      | 0.007 | 0.638 |
| ko00565: Ether.lipid.metabolism                              | Anxiety Score    | 0.0000006  | 0.0000003      | 0.022 | 0.723 |
| ko00760: Nicotinate.and.nicotinamide.metabolism              | Anxiety Score    | 0.0000061  | 0.0000030      | 0.045 | 0.723 |
| ko00130: Ubiquinone.and.other.terpenoid.quinone.biosynthesis | Anxiety Score    | 0.0000098  | 0.0000049      | 0.047 | 0.723 |
| ko00592: alpha.Linolenic.acid.metabolism                     | Anxiety Score    | 0.0000011  | 0.0000006      | 0.057 | 0.723 |
| ko00760: Nicotinate.and.nicotinamide.metabolism              | Depression Score | 0.0000062  | 0.0000025      | 0.014 | 0.607 |
| ko00430: Taurine.and.hypotaurine.metabolism                  | Depression Score | 0.0000026  | 0.0000011      | 0.014 | 0.607 |
| ko00620: Pyruvate.metabolism                                 | Depression Score | 0.0000100  | 0.0000043      | 0.021 | 0.619 |
| ko00565: Ether.lipid.metabolism                              | Depression Score | 0.0000005  | 0.0000002      | 0.023 | 0.619 |
| ko00860: Porphyrin.and.chlorophyll.metabolism                | Depression Score | -0.0000145 | 0.0000066      | 0.029 | 0.619 |
| ko00730: Thiamine.metabolism                                 | Group_Anxiety    | -0.0002334 | 0.0000877      | 0.008 | 0.519 |
| ko00627: Aminobenzoate.degradation                           | Group_Anxiety    | 0.0000876  | 0.0000367      | 0.018 | 0.519 |
| ko00620: Pyruvate.metabolism                                 | Group_Anxiety    | 0.0003038  | 0.0001290      | 0.019 | 0.519 |
| ko01054: Nonribosomal.peptide.structures                     | Group_Anxiety    | 0.0000245  | 0.0000105      | 0.021 | 0.519 |
| ko00430: Taurine.and.hypotaurine.metabolism                  | Group_Anxiety    | 0.0000756  | 0.0000327      | 0.022 | 0.519 |
| ko00860: Porphyrin.and.chlorophyll.metabolism                | Group_Depression | -0.0006189 | 0.0001803      | 0.001 | 0.327 |
| ko00760: Nicotinate.and.nicotinamide.metabolism              | Group_Depression | 0.0002015  | 0.0000690      | 0.004 | 0.403 |
| ko00591: Linoleic.acid.metabolism                            | Group_Depression | 0.0000073  | 0.0000025      | 0.004 | 0.403 |
| ko00430: Taurine.and.hypotaurine.metabolism                  | Group_Depression | 0.0000855  | 0.0000295      | 0.004 | 0.403 |
| ko00440: Phosphonate.and.phosphinate.metabolism              | Group_Depression | 0.0001304  | 0.0000539      | 0.017 | 0.487 |

For each variable, the top five pathways are selected for reporting, as determined by ascending Q-values and P-values.

Table S4: Functional Pathways and Their Correlation with Anxiety/Depression Scores and Anxiety/Non-anxiety and Depression/Non-depression Groupings in Adjusted Model

| Pathway                                                      | Variable         | Estimate   | Standard Error | P     | Q     |
|--------------------------------------------------------------|------------------|------------|----------------|-------|-------|
| ko00430:Taurine.and.hypotaurine.metabolism                   | Anxiety Score    | 0.0000033  | 0.0000013      | 0.014 | 0.977 |
| ko00565:Ether.lipid.metabolism                               | Anxiety Score    | 0.0000006  | 0.0000003      | 0.029 | 0.977 |
| ko00591:Linoleic.acid.metabolism                             | Anxiety Score    | 0.0000002  | 0.0000001      | 0.035 | 0.977 |
| ko03450:Non.homologous.end.joining                           | Anxiety Score    | 0.0000003  | 0.0000001      | 0.035 | 0.977 |
| ko00130: Ubiquinone.and.other.terpenoid.quinone.biosynthesis | Anxiety Score    | 0.0000108  | 0.0000052      | 0.039 | 0.977 |
| ko00760:Nicotinate.and.nicotinamide.metabolism               | Depression Score | 0.0000068  | 0.0000026      | 0.009 | 0.968 |
| ko00430:Taurine.and.hypotaurine.metabolism                   | Depression Score | 0.0000025  | 0.0000011      | 0.026 | 0.968 |
| ko00565:Ether.lipid.metabolism                               | Depression Score | 0.0000005  | 0.0000002      | 0.029 | 0.968 |
| ko03020:RNA.polymerase                                       | Depression Score | -0.0000036 | 0.0000017      | 0.034 | 0.968 |
| ko00020:Citrate.cycle:TCA.cycle.                             | Depression Score | 0.0000105  | 0.0000050      | 0.038 | 0.968 |
| ko00730:Thiamine.metabolism                                  | Group_Anxiety    | -0.0002453 | 0.0000902      | 0.007 | 0.967 |
| ko01054:Nonribosomal.peptide.structures                      | Group_Anxiety    | 0.0000287  | 0.0000108      | 0.009 | 0.967 |
| ko00903:Limonene.and.pinene.degradation                      | Group_Anxiety    | 0.0000448  | 0.0000173      | 0.011 | 0.967 |
| ko00627:Aminobenzoate.degradation                            | Group_Anxiety    | 0.0000965  | 0.0000382      | 0.013 | 0.967 |
| ko00590:Arachidonic.acid.metabolism                          | Group_Anxiety    | 0.0000495  | 0.0000198      | 0.013 | 0.967 |
| ko00591:Linoleic.acid.metabolism                             | Group_Depression | 0.0000081  | 0.0000026      | 0.002 | 0.979 |
| ko00860:Porphyrin.and.chlorophyll.metabolism                 | Group_Depression | -0.0005583 | 0.0001864      | 0.003 | 0.979 |
| ko00760:Nicotinate.and.nicotinamide.metabolism               | Group_Depression | 0.0001948  | 0.0000709      | 0.007 | 0.979 |
| ko00430:Taurine.and.hypotaurine.metabolism                   | Group_Depression | 0.0000760  | 0.0000306      | 0.014 | 0.979 |
| ko00909:Sesquiterpenoid.and.triterpenoid.biosynthesis        | Group_Depression | 0.0000063  | 0.0000026      | 0.017 | 0.979 |

For each variable, the top five pathways are selected for reporting, as determined by ascending Q-values and P-values.

Table S5: The List of Enzymes Significantly Associated with Anxiety and Depression in Unadjusted Model

| Feature                                                            | Variable         | Estimate   | Standard Error | P      | Q     |
|--------------------------------------------------------------------|------------------|------------|----------------|--------|-------|
| EC.2.1.1.195: cobalt-precorrin-5B (C1)-methyltransferase           | Group_Depression | -0.0001280 | 0.0000323      | <0.001 | 0.109 |
| EC.2.7.8.26: adenosylcobinamide-GDP ribazoletransferase            | Group_Depression | -0.0001146 | 0.0000285      | <0.001 | 0.109 |
| EC.6.3.1.10: adenosylcobinamide-phosphate synthase                 | Group_Depression | -0.0001255 | 0.0000313      | <0.001 | 0.109 |
| EC.6.3.5.9.6.3.5.11: cobyric acid a,c-diamide synthase             | Group_Depression | -0.0001361 | 0.0000327      | <0.001 | 0.109 |
| EC.2.1.1.131: precorrin-3B C17-methyltransferase                   | Group_Depression | -0.0001353 | 0.0000357      | <0.001 | 0.152 |
| EC.6.3.5.10: adenosylcobyric acid synthase (glutamine-hydrolyzing) | Group_Depression | -0.0001131 | 0.0000303      | <0.001 | 0.165 |

|                                            |                  |            |           |        |       |
|--------------------------------------------|------------------|------------|-----------|--------|-------|
| EC.3.7.1.12: cobalt-precorrin 5A hydrolase | Group_Depression | -0.0001341 | 0.0000366 | <0.001 | 0.186 |
| EC.3.5.3.1: arginase                       | Group_Anxiety    | 0.0000772  | 0.0000191 | <0.001 | 0.194 |

Figure S1:

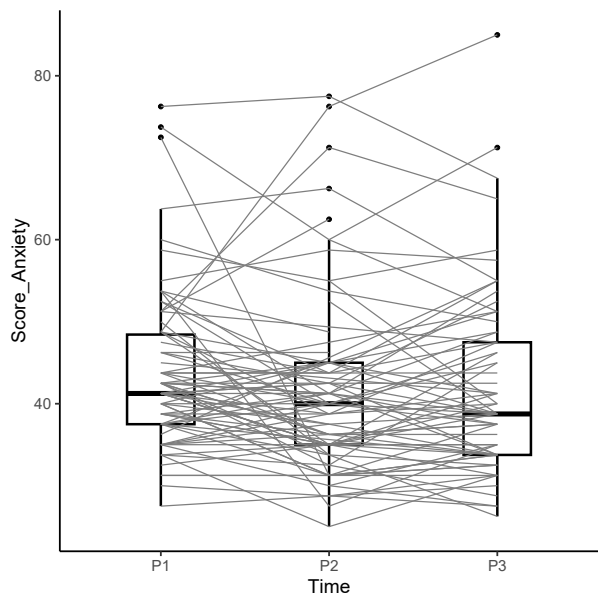

Figure S1: Temporal Trends in Anxiety Scores Across Multiple Time Points. The figure illustrates the changes in anxiety scores of research subjects at different time points. Each data point represents an individual research subject’s data at a specific time point, and the data for the same research subject across different time points is connected by a line. The central bold line within each box represents the median, indicating the middle value where half the data points are above and half are below. The edges of the box delineate the upper and lower quartiles, marking the 75th and 25th percentiles, respectively.

Figure S2:

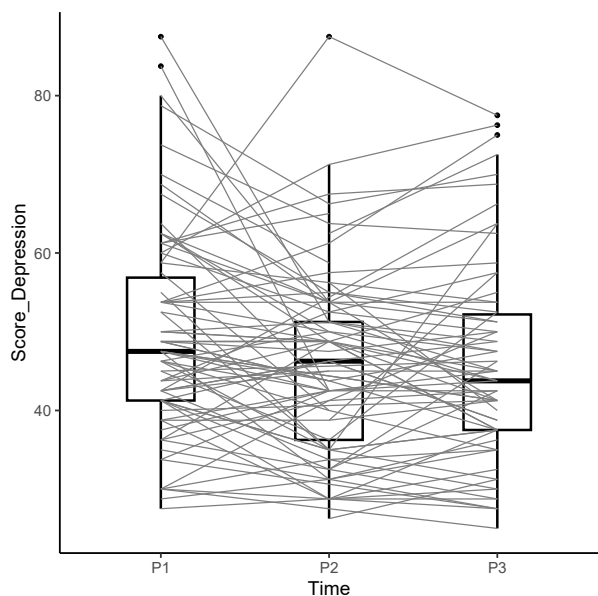

**Figure S2.** Temporal Trends in Depression Scores Across Multiple Time Points. The figure illustrates the changes in depression scores of research subjects at different time points. Each data point represents an individual research subject's data at a specific time point, and the data for the same research subject across different time points is connected by a line. The central bold line within each box represents the median, indicating the middle value where half the data points are above and half are below. The edges of the box delineate the upper and lower quartiles, marking the 75th and 25th percentiles, respectively.
